# Supplementary material
Source: PubMed Central journal article supplement (PMC5790181)
Supplement: NIHMS75706-supplement-Supplementary_figures.pdf [file NIHMS75706-supplement-Supplementary_figures.pdf]

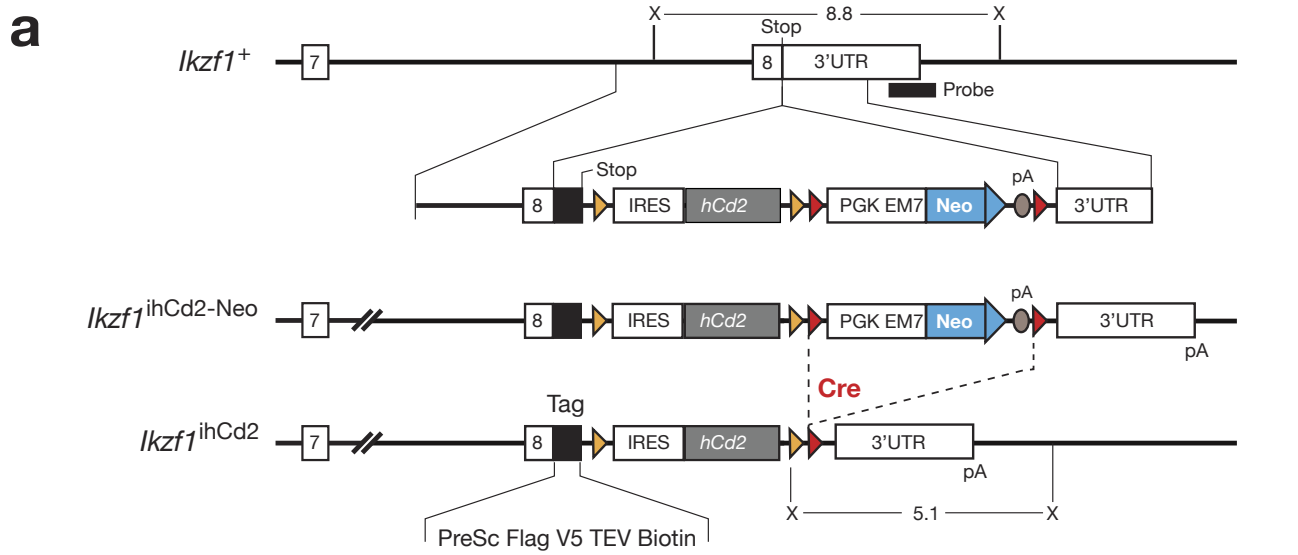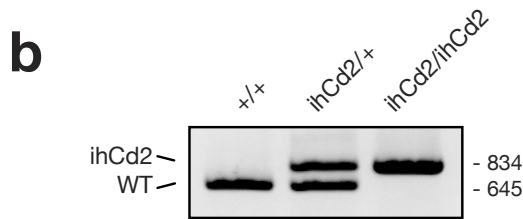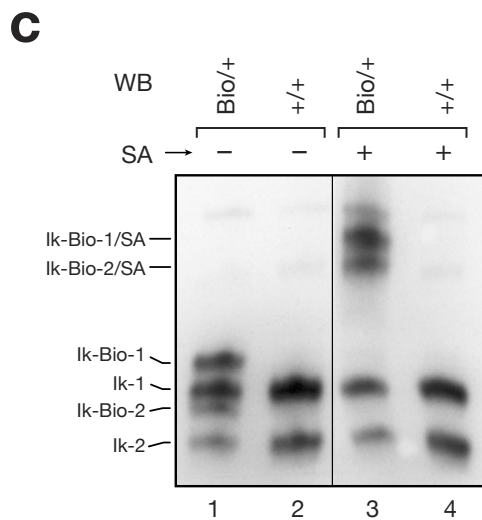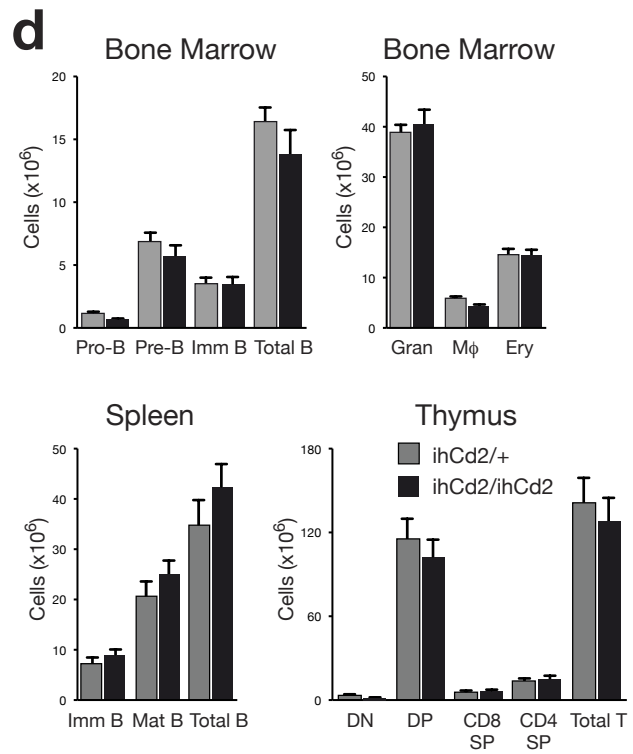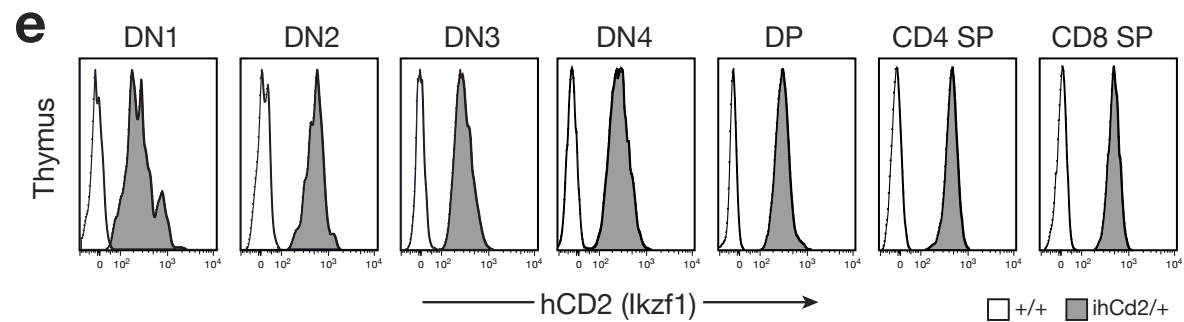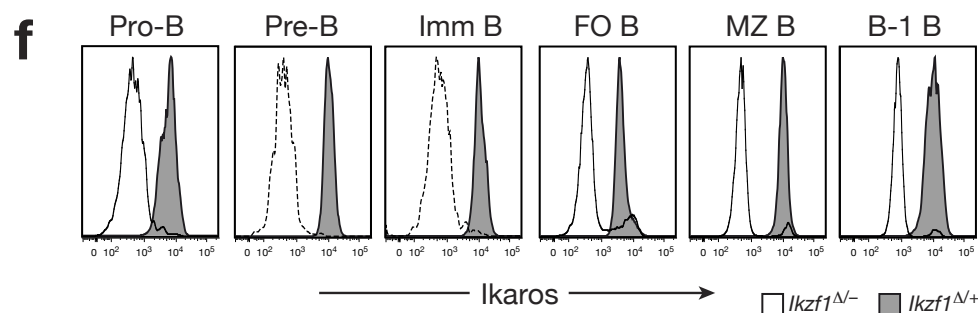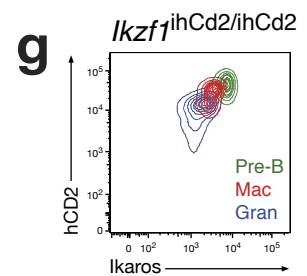

**a**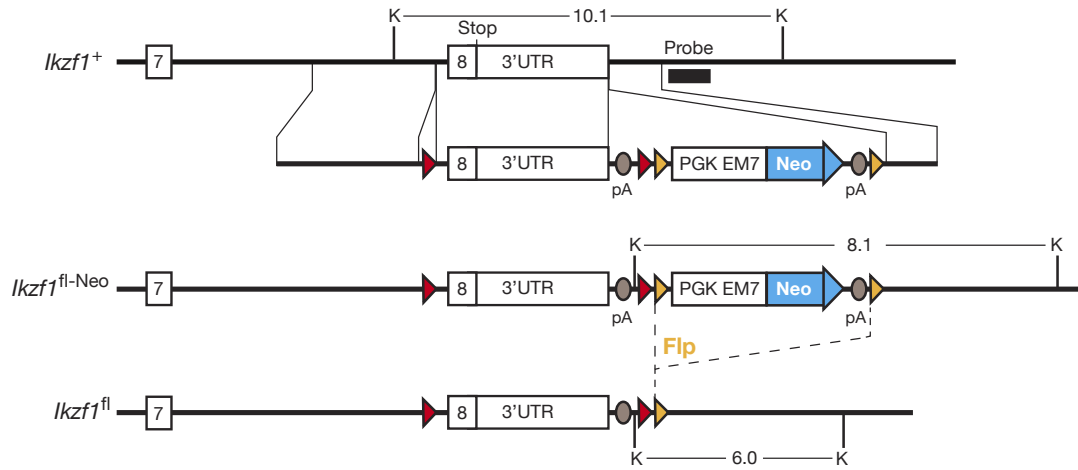**b**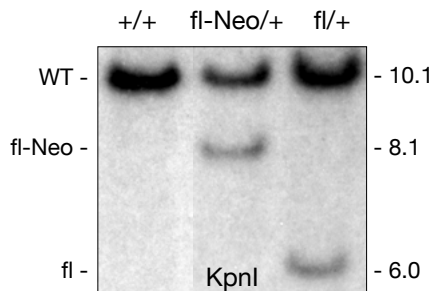**c**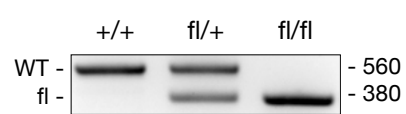**f**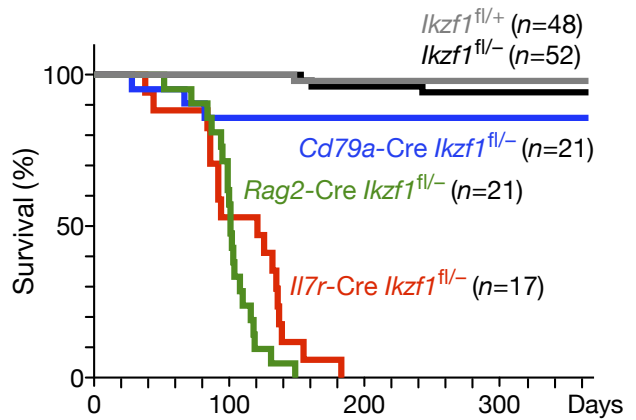**d**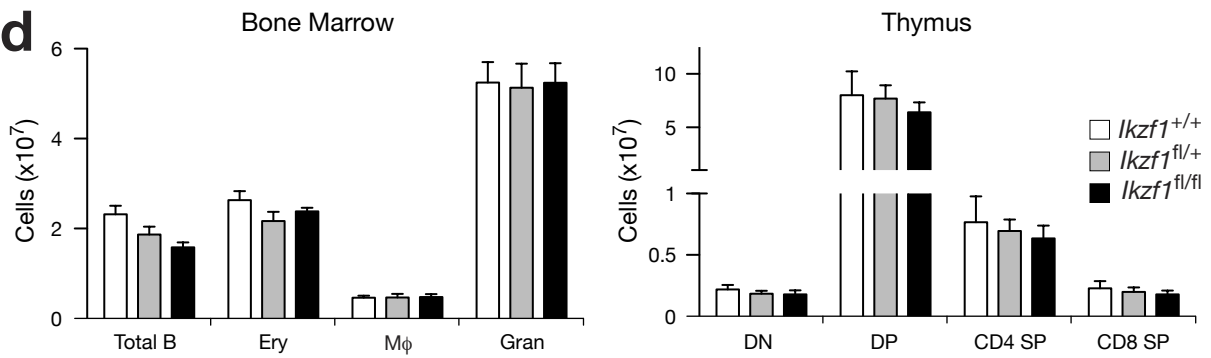**e**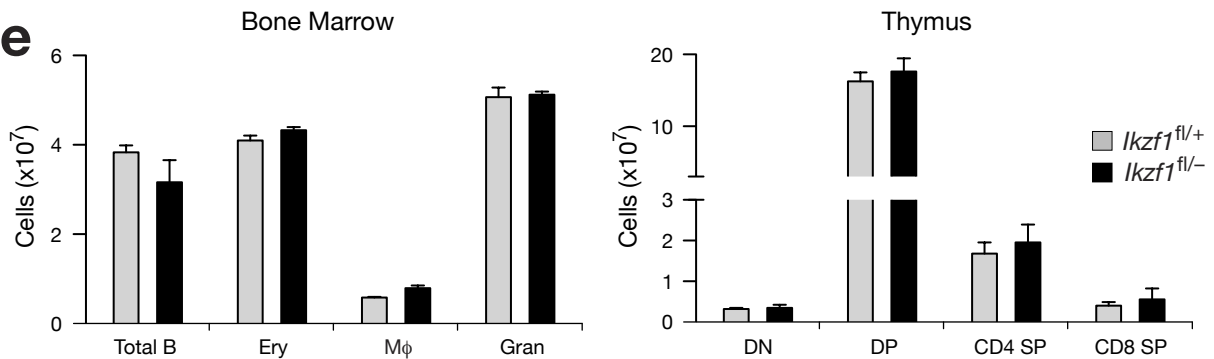

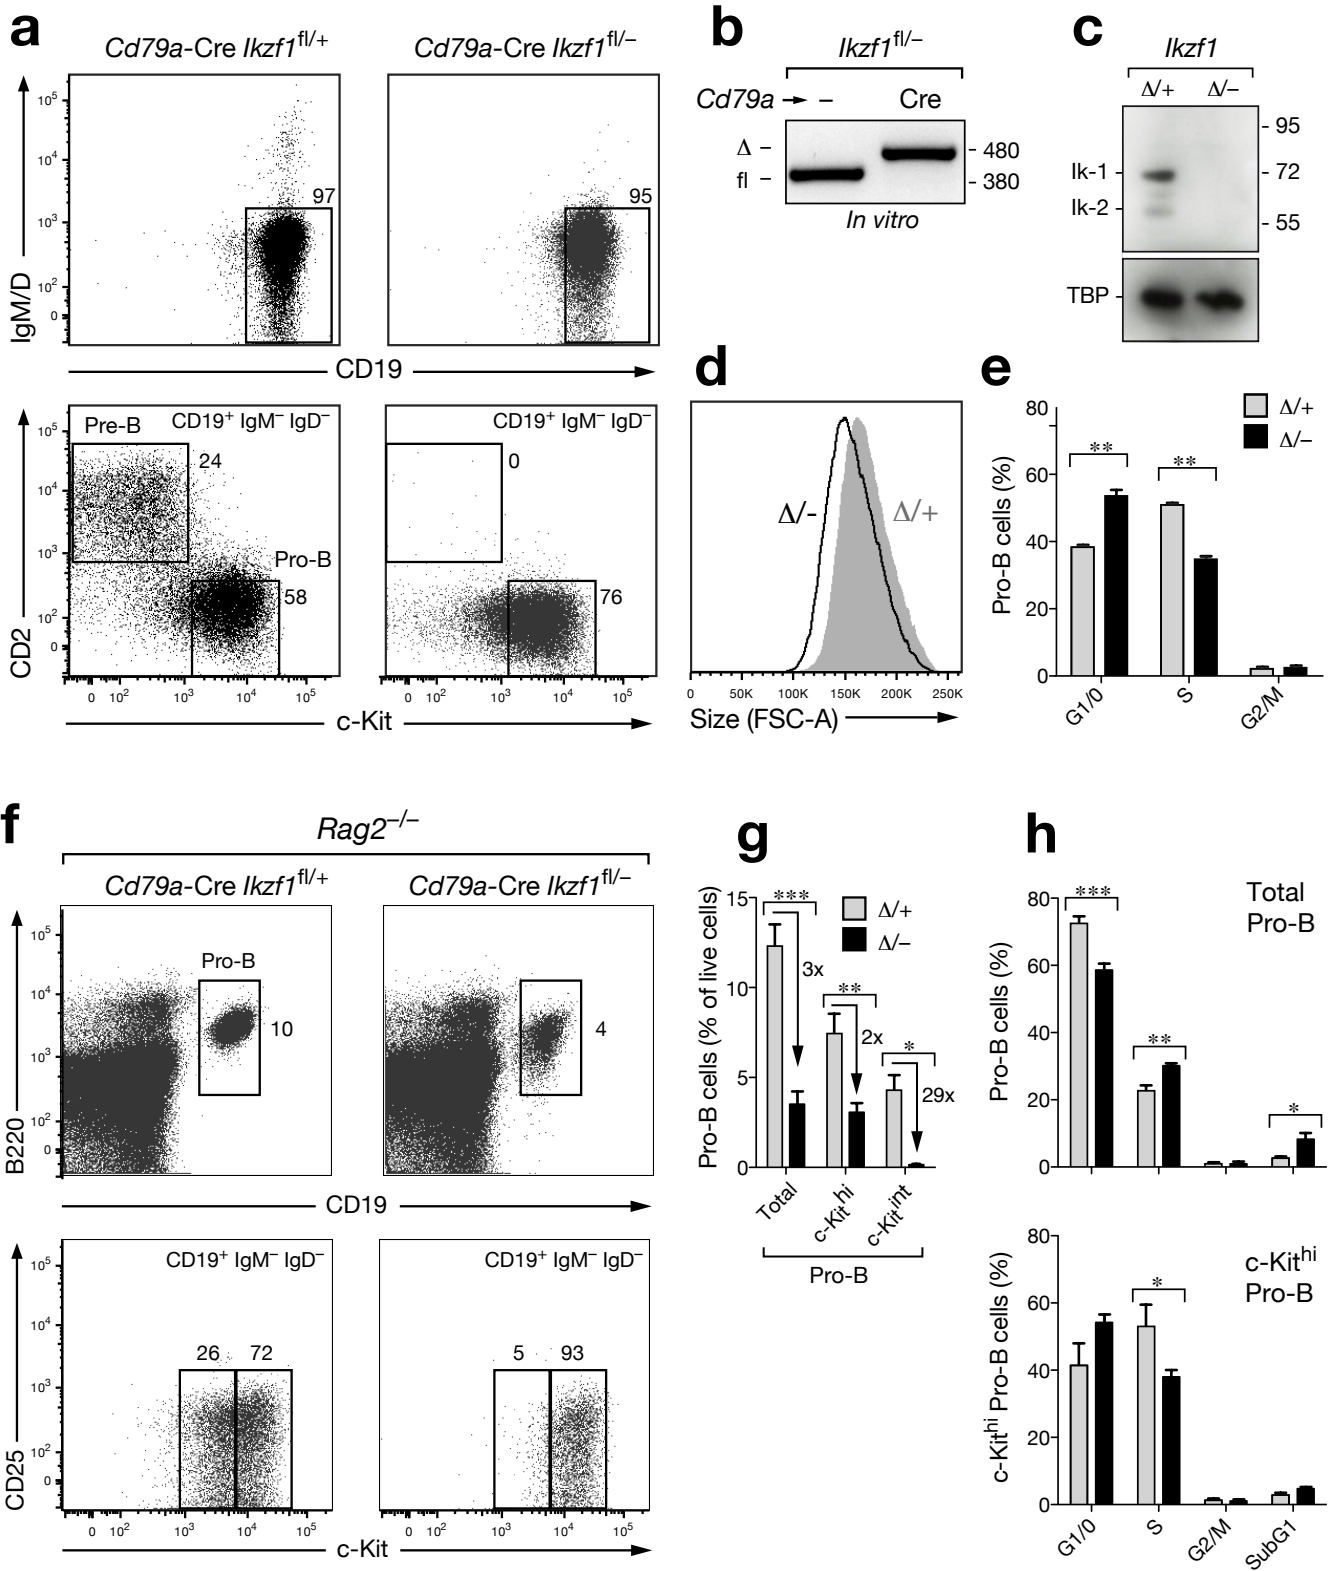

**a**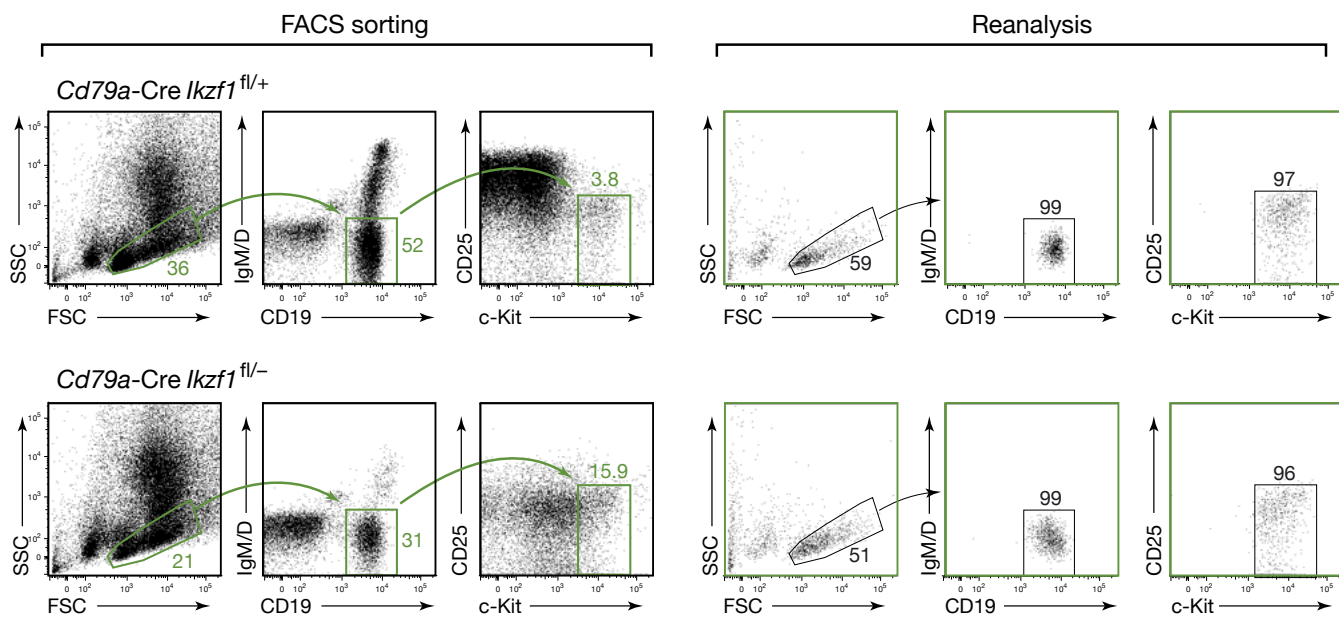**b**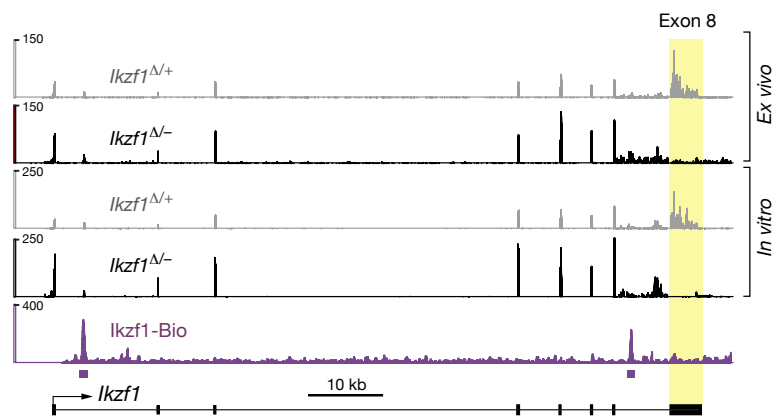**c**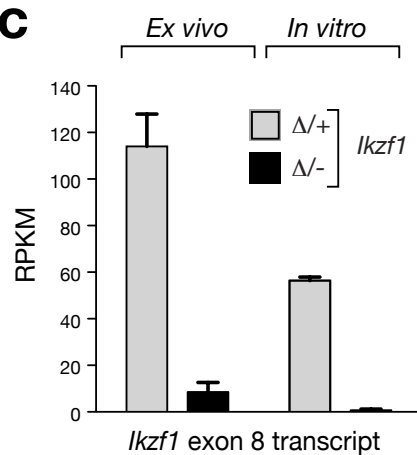**d**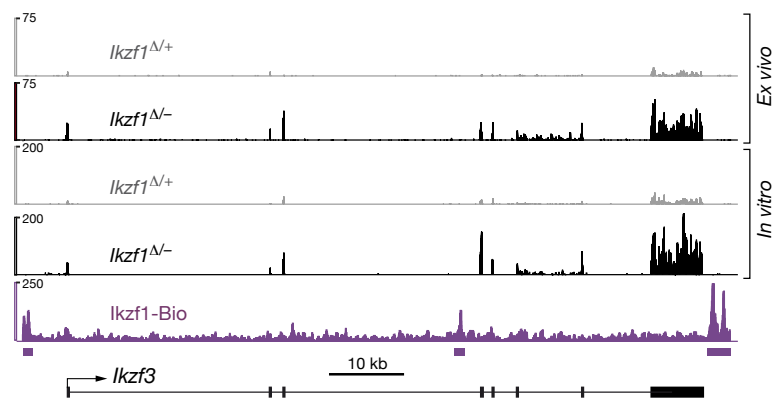**e**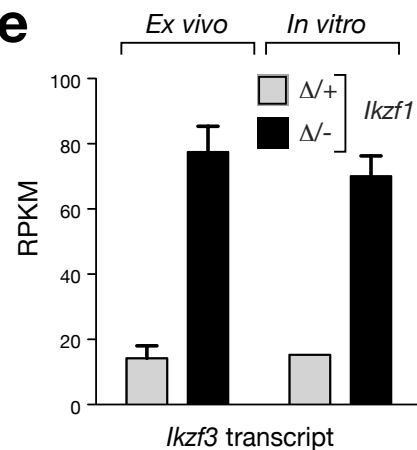

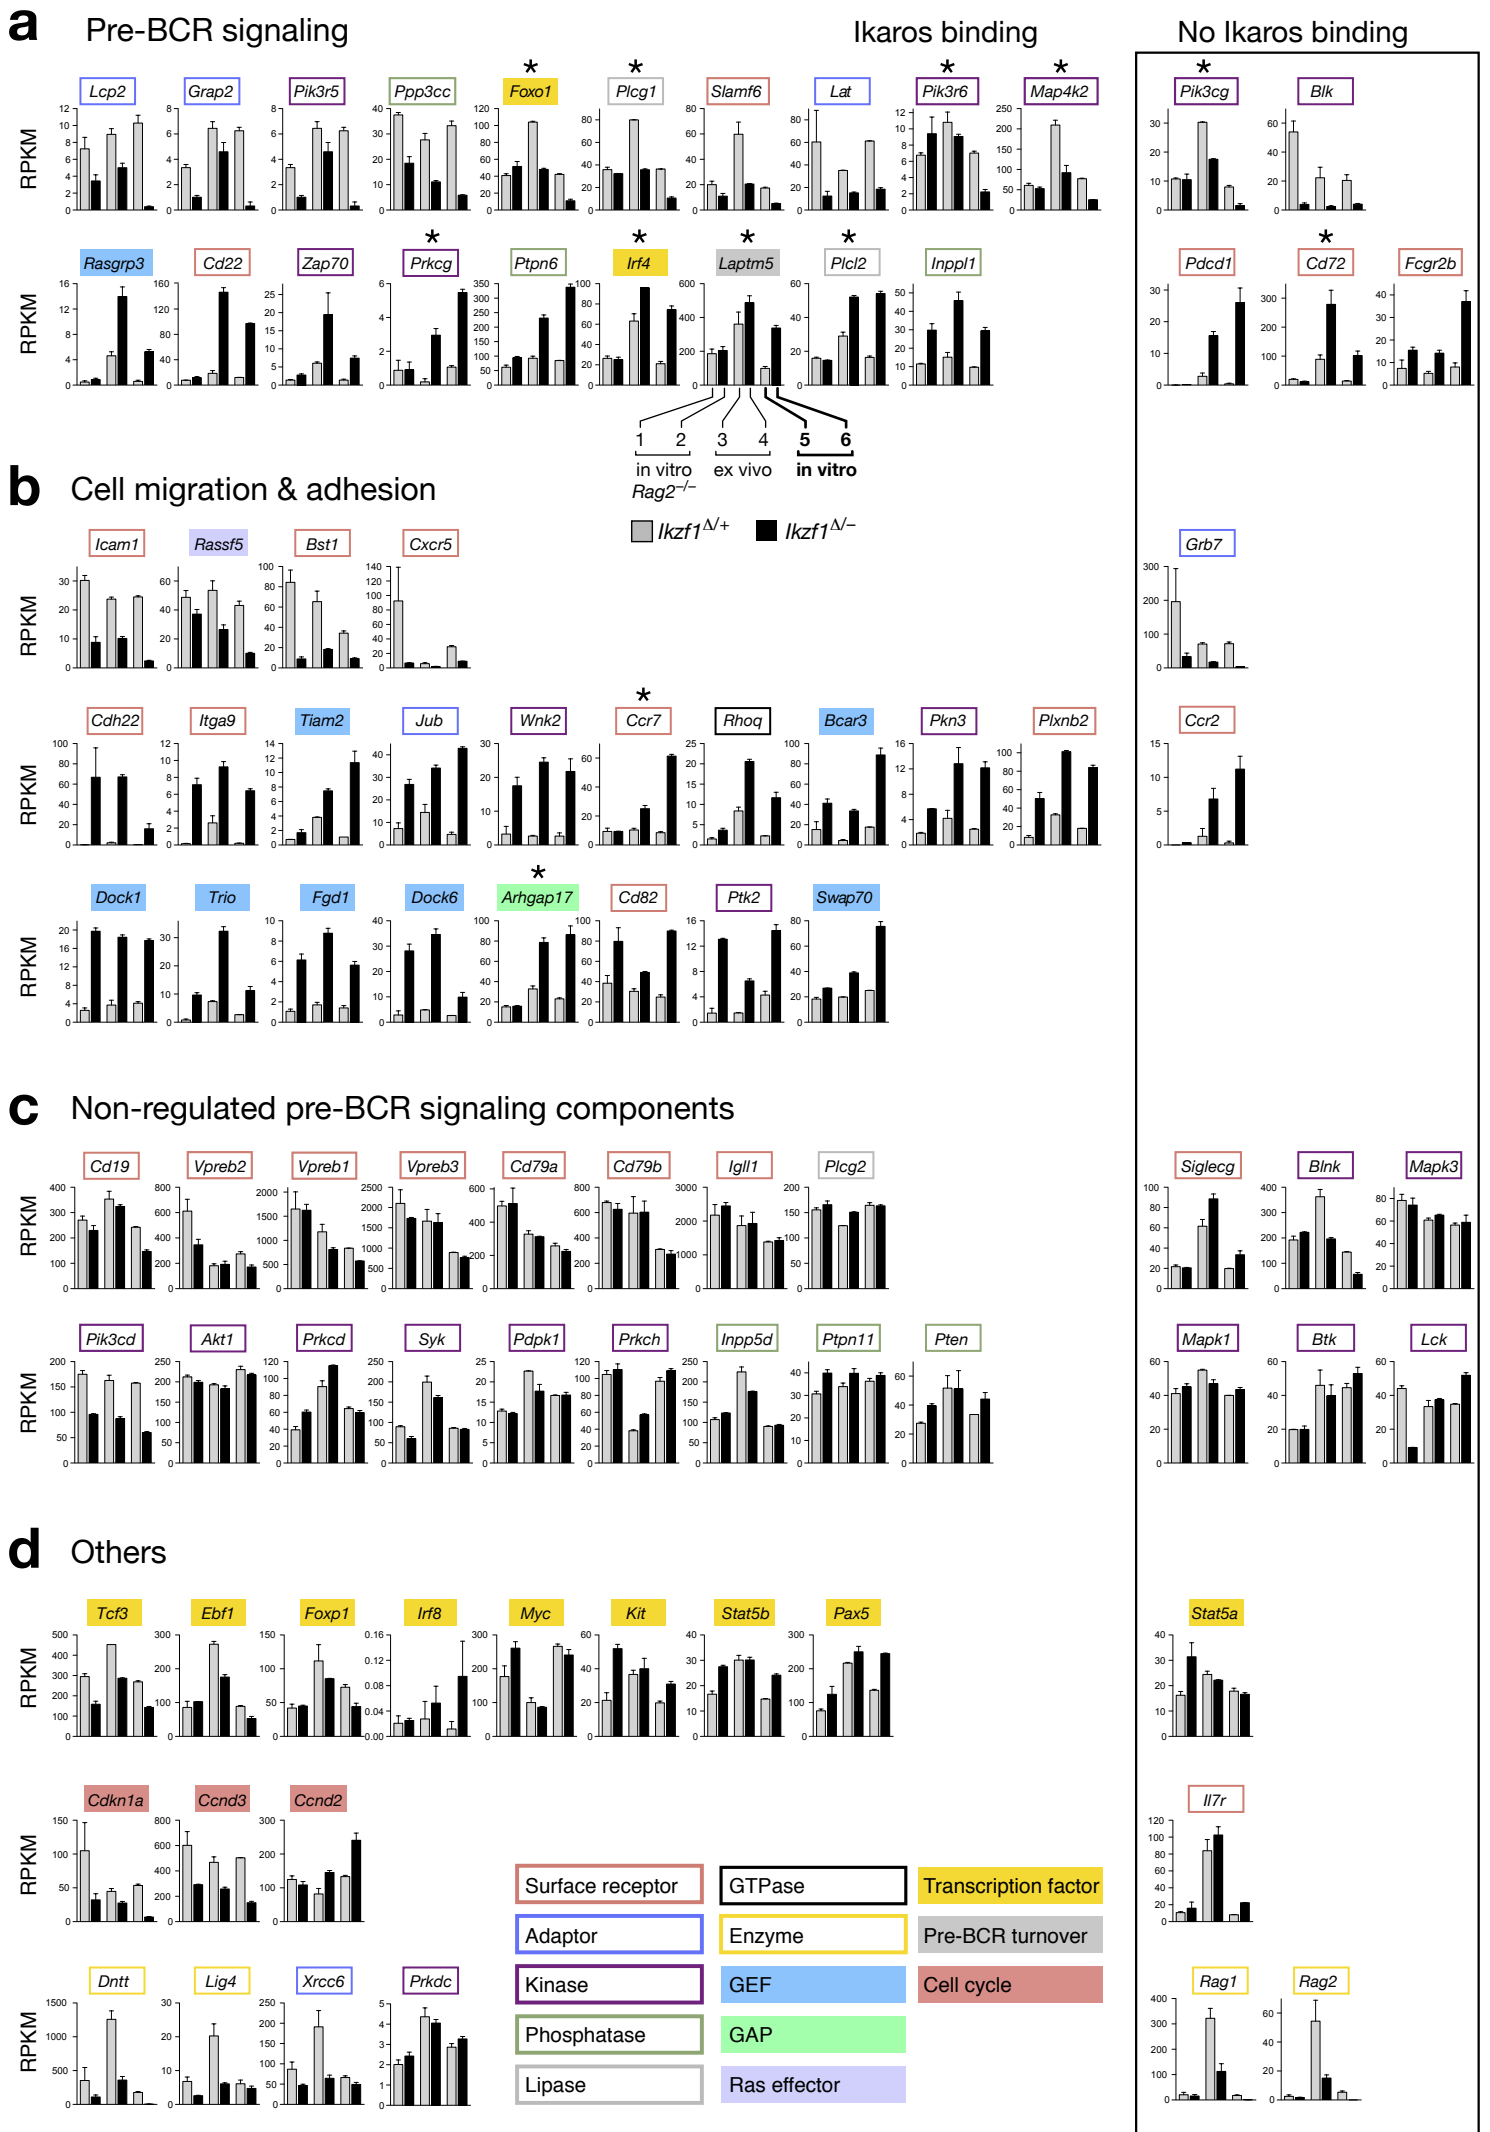

Supplementary Figure 5 (Schwickert et al.)

**a**

## Ikaros target genes

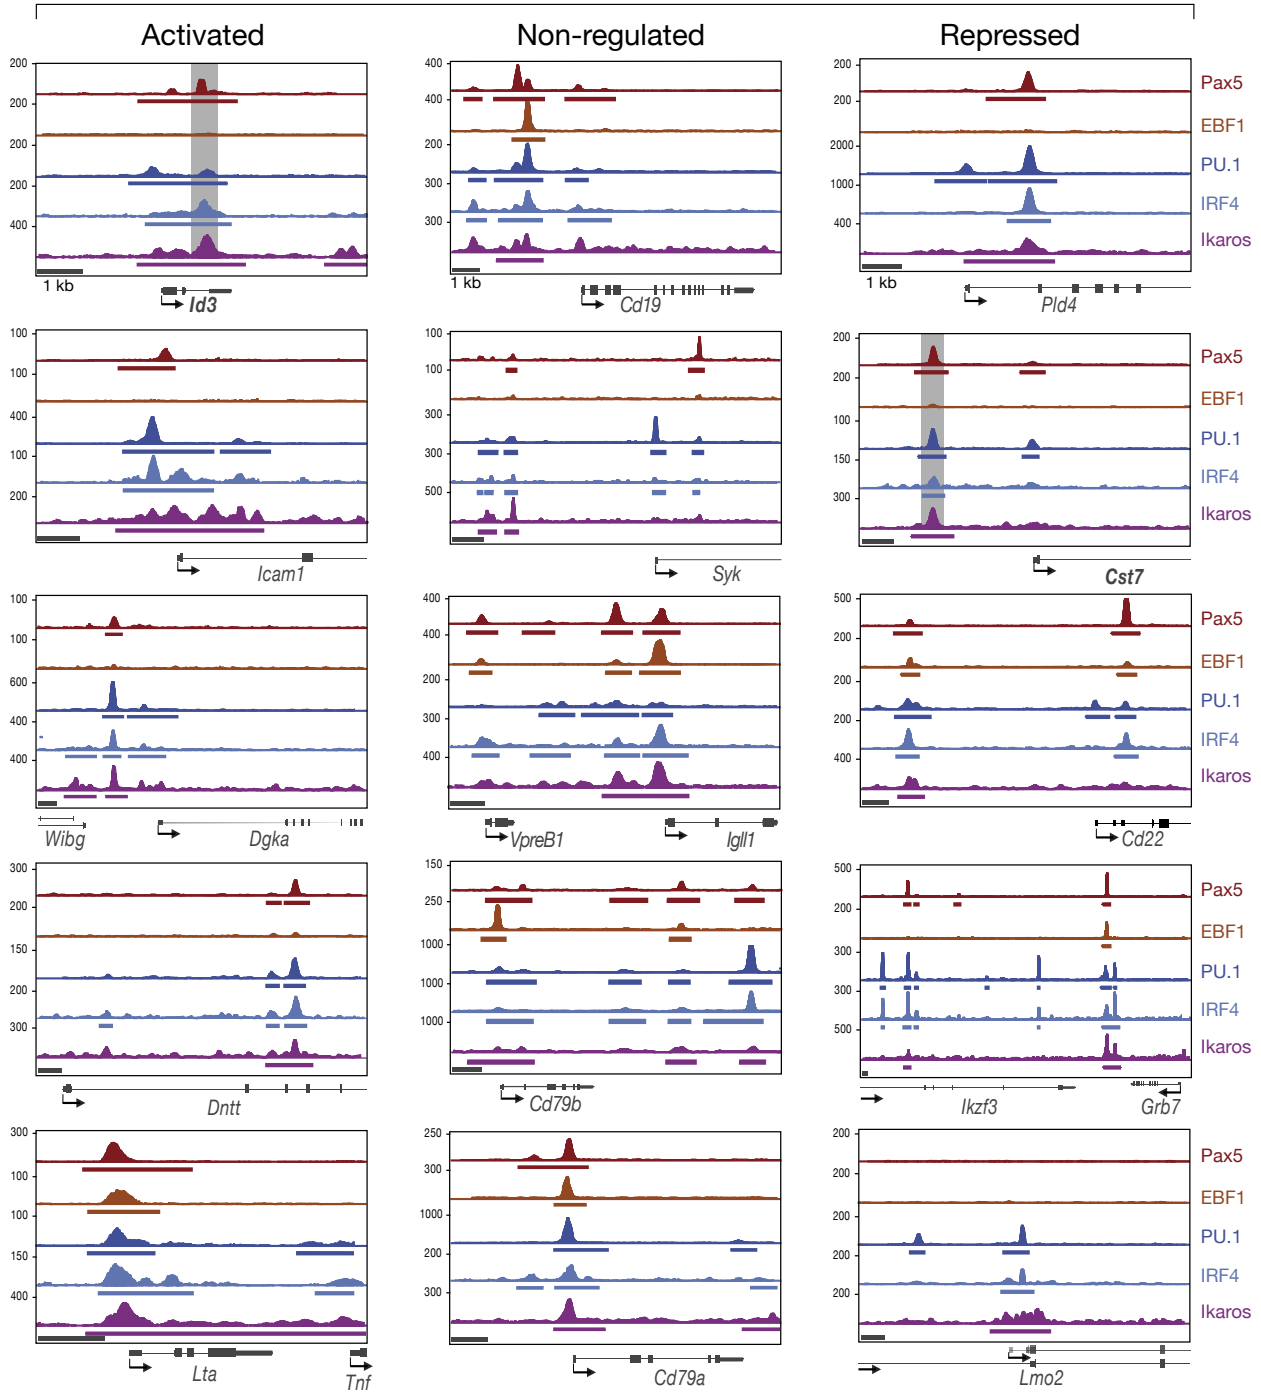**b**

## Coregulation by Ikaros and Pax5

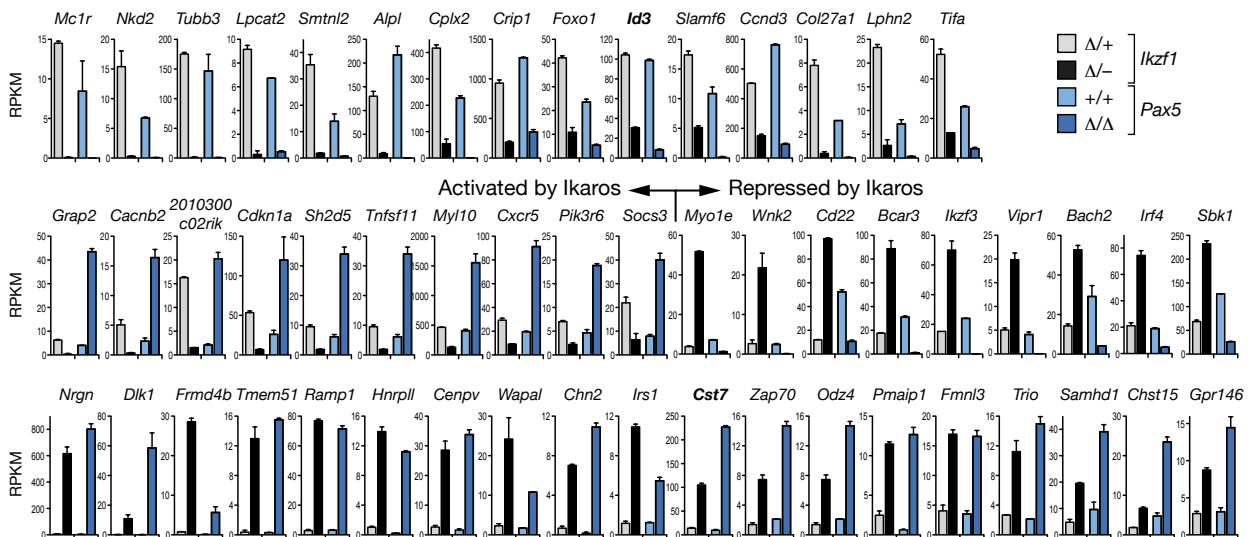

**a**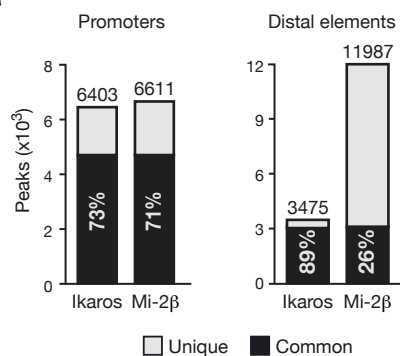**b**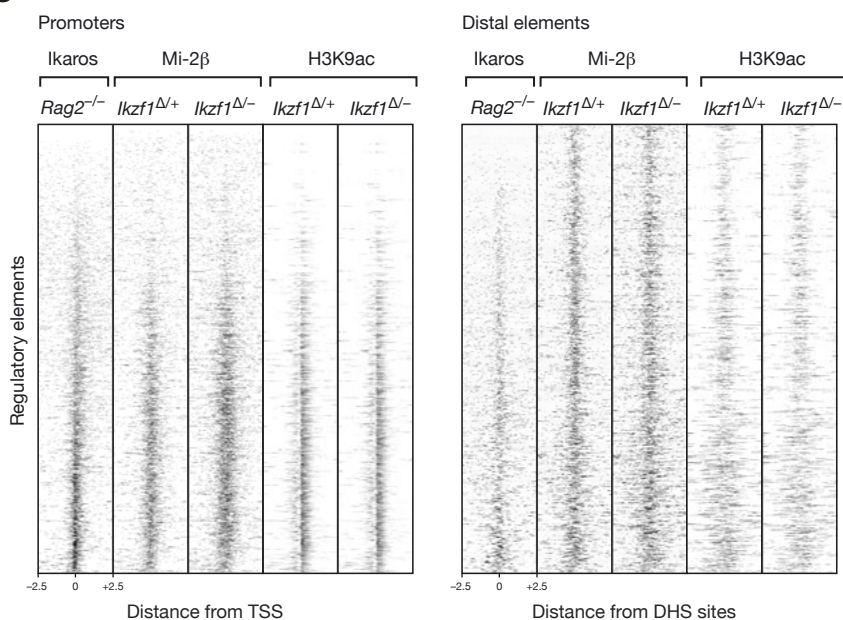**c**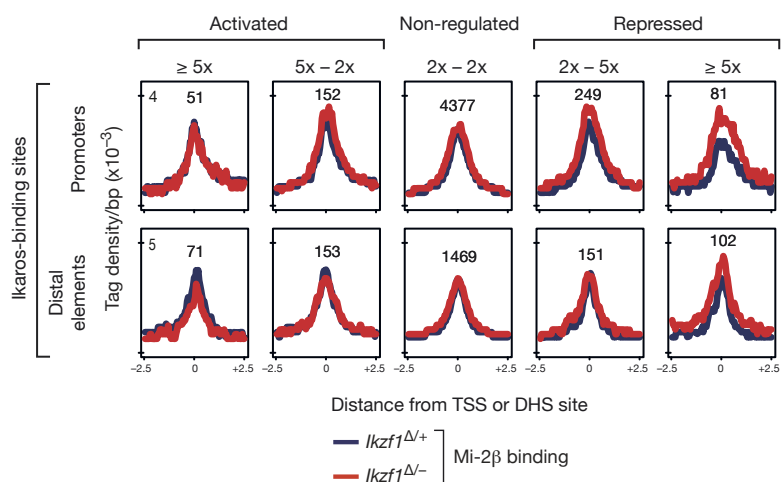

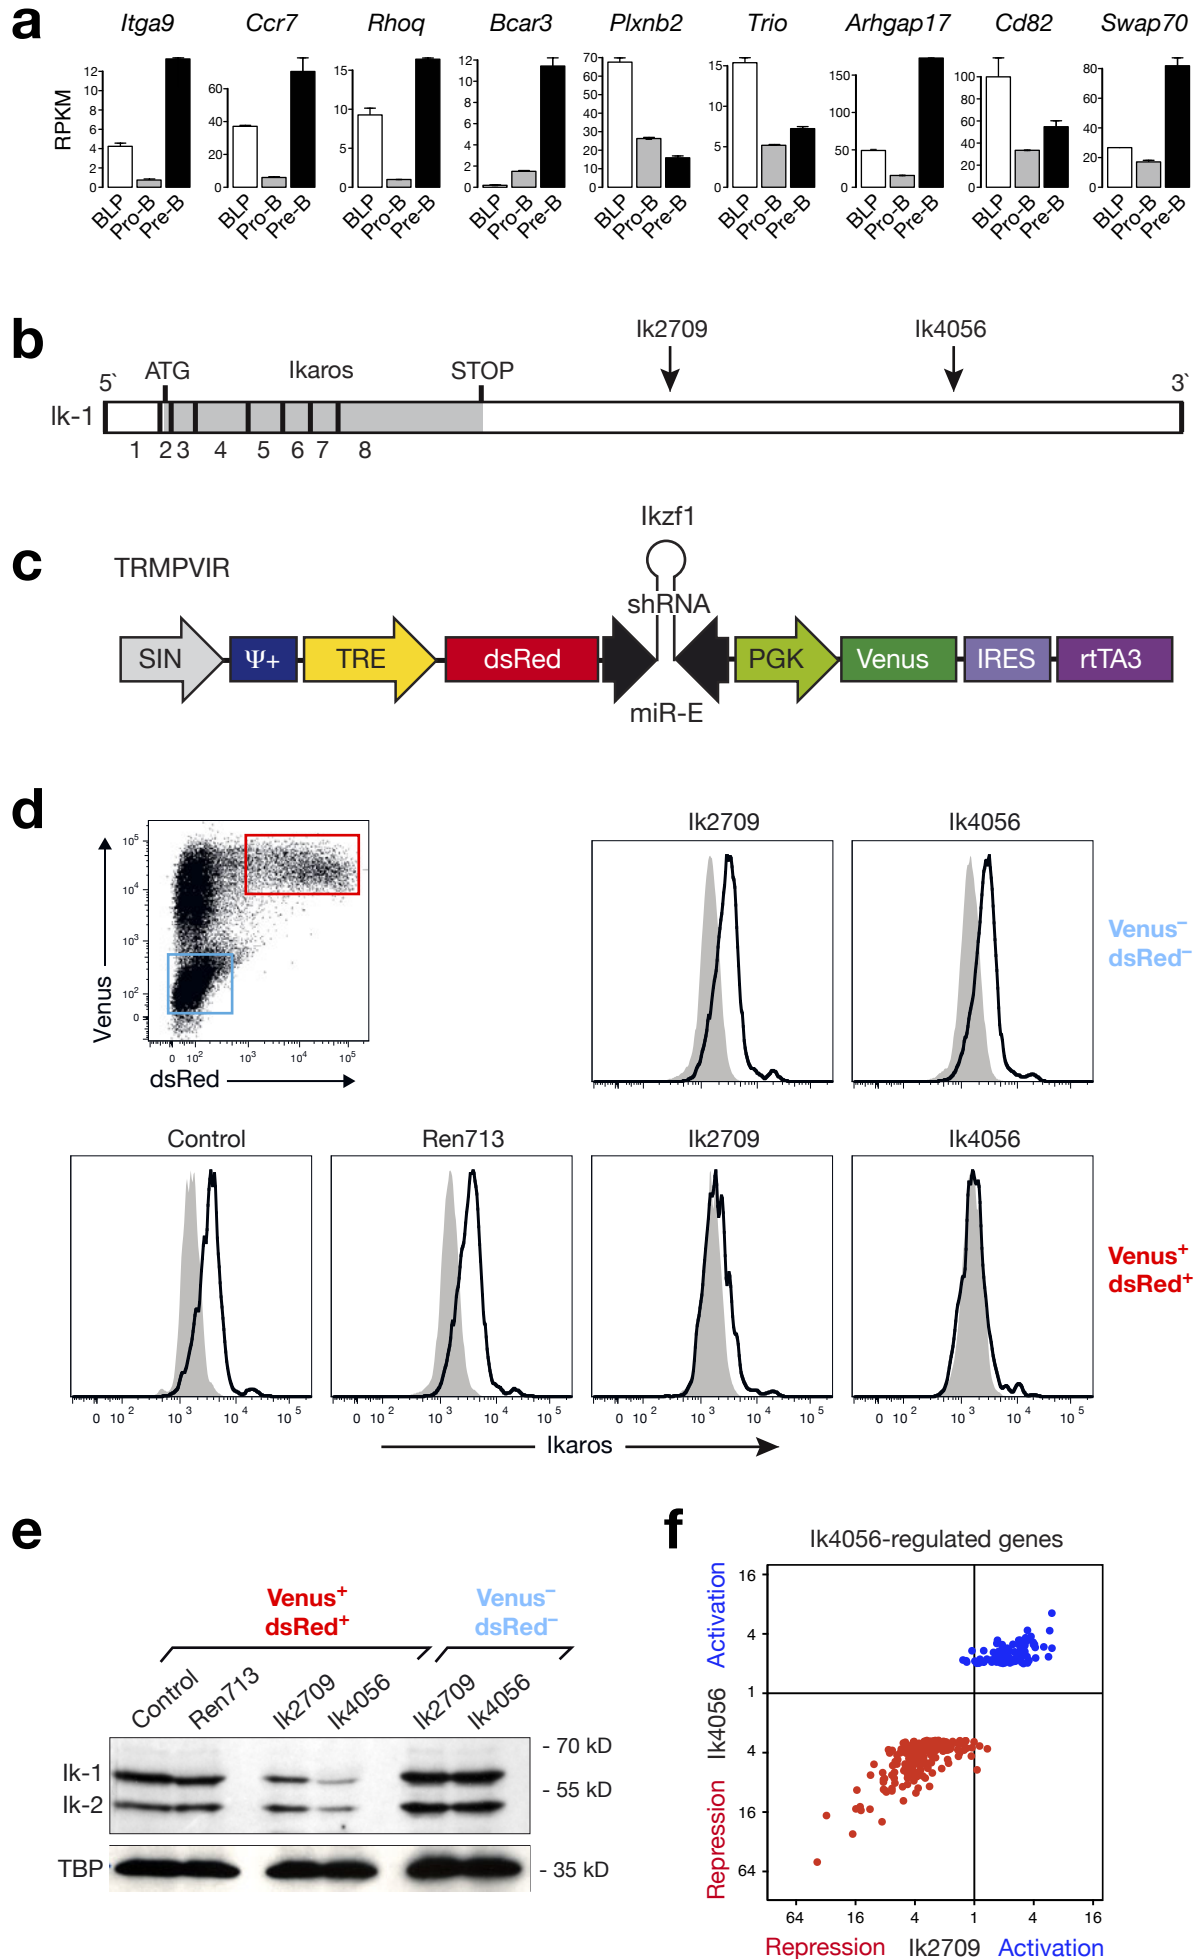

Supplementary Figure 8 (Schwickert et al.)
