# Supplementary material
Source: PubMed Central journal article supplement (PMC5790181)
Supplement: NIHMS75706-supplement-Table_S2.pdf [file NIHMS75706-supplement-Table_S2.pdf]

**Supplementary Table S2: Description of all Illumina sequencing experiments generated for this study (GSE53595)**

| GEO accession # | Exp. # | Sample description                               | Genotype                                           | Cell preparation                  | Sequencing protocol | Mapped reads (x Mio) |
|-----------------|--------|--------------------------------------------------|----------------------------------------------------|-----------------------------------|---------------------|----------------------|
| GSM1296533      | 8677   | PU.1 Bio-ChIP-seq pro-B                          | Spi1(ihCd2/ihCd2) R26(BirA/BirA)                   | 5 day culture                     | 36 bp single read   | 27.8                 |
| GSM1296535      | 9102   | Ikaros Bio-ChIP-seq pro-B                        | Ikzf1(ihCd2/ihCd2) R26(BirA/BirA) Rag2(-/-)        | 6 day culture                     | 100 bp paired end   | 180.4                |
| GSM1296544      | 11890  | Ikaros Bio-ChIP-seq B cell progenitors           | Ikzf1(ihCd2/ihCd2) R26(BirA/+) Ebf1(fl/fl) Vav-Cre | 5 week culture                    | 50 bp single read   | 55.7                 |
| GSM1296538      | 11263  | Ikaros bio-ChIP-seq DP-T                         | Ikzf1(ihCd2/ihCd2) R26(BirA/BirA)                  | Ex vivo, MACS-sorted              | 36 bp single read   | 38.3                 |
| GSM1296534      | 8844   | IRF4 ChIP-seq pro-B                              | Rag2(-/-)                                          | 4-5 day culture                   | 76 bp paired end    | 22.5                 |
| GSM1296532      | 8659   | EBF1 V5-ChIP-seq pro-B                           | Ebf1(Bio/Bio)                                      | 4-5 day culture                   | 36 bp single read   | 22.8                 |
| GSM1296550      | 13309  | Mi-2β (CHD4) ChIP-seq Ikzf1(Δ/+) pro-B           | Ikzf1(fl/+) Cd79(cre/+)                            | 7 day culture                     | 50 bp single read   | 28.4                 |
| GSM1296551      | 13310  | Mi-2β (CHD4) ChIP-seq Ikzf1(Δ/+) pro-B           | Ikzf1(fl/-) Cd79(cre/+)                            | 10 day culture                    | 50 bp single read   | 31.5                 |
| GSM1296572      | 15831  | H3K9ac ChIP-seq Rag2(-/-) Ikzf1(Δ/+) pro-B       | Rag2(-/-) Ikzf1(fl/+) Cd79a(Cre/+)                 | 7 day culture                     | 50 bp single read   | 30.1                 |
| GSM1296573      | 15832  | H3K9ac ChIP-seq Rag2(-/-) Ikzf1(Δ/+) pro-B       | Rag2(-/-) Ikzf1(fl/+) Cd79a(Cre/+)                 | 10 day culture                    | 50 bp single read   | 31.4                 |
| GSM1296574      | 15833  | H3K9ac ChIP-seq Rag2(-/-) Ikzf1(Δ/-) pro-B       | Rag2(-/-) Ikzf1(fl/-) Cd79a(Cre/+)                 | 9 day culture                     | 50 bp single read   | 27.8                 |
| GSM1296575      | 15834  | H3K9ac ChIP-seq Rag2(-/-) Ikzf1(Δ/-) pro-B       | Rag2(-/-) Ikzf1(fl/-) Cd79a(Cre/+)                 | 12 day culture                    | 50 bp single read   | 29.2                 |
| GSM1296576      | 15839  | H3K4me3 ChIP-seq Rag2(-/-) Ikzf1(Δ/+) pro-B      | Rag2(-/-) Ikzf1(fl/+) Cd79a(Cre/+)                 | 7 day culture                     | 50 bp single read   | 56.5                 |
| GSM1296577      | 15840  | H3K4me3 ChIP-seq Rag2(-/-) Ikzf1(Δ/+) pro-B      | Rag2(-/-) Ikzf1(fl/+) Cd79a(Cre/+)                 | 10 day culture                    | 50 bp single read   | 57.1                 |
| GSM1296578      | 15841  | H3K4me3 ChIP-seq Rag2(-/-) Ikzf1(Δ/-) pro-B      | Rag2(-/-) Ikzf1(fl/-) Cd79a(Cre/+)                 | 9 day culture                     | 50 bp single read   | 31.7                 |
| GSM1296579      | 15842  | H3K4me3 ChIP-seq Rag2(-/-) Ikzf1(Δ/-) pro-B      | Rag2(-/-) Ikzf1(fl/-) Cd79a(Cre/+)                 | 12 day culture                    | 50 bp single read   | 34.8                 |
| GSM1296537      | 10195  | ChIP input pro-B                                 | Rag2(-/-)                                          | 4 day culture                     | 76 bp paired end    | 37.5                 |
| GSM1296536      | 9908   | ChIP input DN3                                   | Rag2(-/-)                                          | Ex vivo                           | 76 bp paired end    | 43.0                 |
| GSM1296539      | 11597  | RNA-seq pro-B (c-Kit high)                       | Ikzf1(fl/-) Cd79a(Cre/+)                           | Ex vivo, FACS-sorted              | 50 bp single read   | 11.2                 |
| GSM1296545      | 12072  | RNA-seq pro-B (c-Kit high)                       | Ikzf1(fl/-) Cd79a(Cre/+)                           | Ex vivo, FACS-sorted              | 50 bp single read   | 16.6                 |
| GSM1296546      | 12073  | RNA-seq pro-B (c-Kit high)                       | Ikzf1(fl/+) Cd79a(Cre/+)                           | Ex vivo, FACS-sorted              | 50 bp single read   | 16.7                 |
| GSM1296549      | 12806  | RNA-seq pro-B (c-Kit high)                       | Ikzf1(fl/+) Cd79a(Cre/+)                           | Ex vivo, FACS-sorted              | 50 bp single read   | 2.8                  |
| GSM1296540      | 11598  | RNA-seq pro-B                                    | Ikzf1(fl/+) Cd79a(Cre/+)                           | 5 day culture, FACS-sorted        | 50 bp single read   | 13.3                 |
| GSM1296541      | 11599  | RNA-seq pro-B                                    | Ikzf1(fl/+) Cd79a(Cre/+)                           | 5 day culture, FACS-sorted        | 50 bp single read   | 11.8                 |
| GSM1296542      | 11600  | RNA-seq pro-B                                    | Ikzf1(fl/-) Cd79a(Cre/+)                           | 7 day culture, FACS-sorted        | 50 bp single read   | 14.1                 |
| GSM1296543      | 11601  | RNA-seq pro-B                                    | Ikzf1(fl/-) Cd79a(Cre/+)                           | 7 day culture, FACS-sorted        | 50 bp single read   | 12.8                 |
| GSM1296552      | 15260  | RNA-seq pro-B                                    | Ikzf1(fl/+) Cd79a(Cre/+) Rag2(-/-)                 | 5 day culture, FACS-sorted        | 50 bp single read   | 34.1                 |
| GSM1296553      | 15261  | RNA-seq pro-B                                    | Ikzf1(fl/+) Cd79a(Cre/+) Rag2(-/-)                 | 11 day culture, FACS-sorted       | 50 bp single read   | 30.4                 |
| GSM1296554      | 15262  | RNA-seq pro-B                                    | Ikzf1(fl/-) Cd79a(Cre/+) Rag2(-/-)                 | 7 day culture, FACS-sorted        | 50 bp single read   | 38.0                 |
| GSM1296555      | 15263  | RNA-seq pro-B                                    | Ikzf1(fl/-) Cd79a(Cre/+) Rag2(-/-)                 | 13 day culture, FACS-sorted       | 50 bp single read   | 38.4                 |
| GSM1296547      | 12078  | RNA-seq pre-B                                    | Wild-type                                          | Ex vivo, FACS-sorted              | 50 bp single read   | 27.2                 |
| GSM1296548      | 12079  | RNA-seq pre-B                                    | Wild-type                                          | Ex vivo, FACS-sorted              | 50 bp single read   | 14.9                 |
| GSM1296556      | 15270  | RNA-seq Ikaros KD empty vector control pre-pro-B | Ebf1(-/-)                                          | 4 days Dox induction, FACS-sorted | 50 bp single read   | 20.2                 |
| GSM1296560      | 15276  | RNA-seq Ikaros KD empty vector control pre-pro-B | Ebf1(-/-)                                          | 4 days Dox induction, FACS-sorted | 50 bp single read   | 20.1                 |
| GSM1296564      | 15282  | RNA-seq Ikaros KD empty vector control pre-pro-B | Ebf1(-/-)                                          | 4 days Dox induction, FACS-sorted | 50 bp single read   | 39.5                 |
| GSM1296568      | 15288  | RNA-seq Ikaros KD empty vector control pre-pro-B | Ebf1(-/-)                                          | 4 days Dox induction, FACS-sorted | 50 bp single read   | 31.4                 |
| GSM1296557      | 15271  | RNA-seq Ikaros KD Ren713 control pre-pro-B       | Ebf1(-/-)                                          | 4 days Dox induction, FACS-sorted | 50 bp single read   | 21.9                 |
| GSM1296561      | 15277  | RNA-seq Ikaros KD Ren713 control pre-pro-B       | Ebf1(-/-)                                          | 4 days Dox induction, FACS-sorted | 50 bp single read   | 20.7                 |
| GSM1296565      | 15283  | RNA-seq Ikaros KD Ren713 control pre-pro-B       | Ebf1(-/-)                                          | 4 days Dox induction, FACS-sorted | 50 bp single read   | 38.6                 |
| GSM1296569      | 15289  | RNA-seq Ikaros KD Ren713 control pre-pro-B       | Ebf1(-/-)                                          | 4 days Dox induction, FACS-sorted | 50 bp single read   | 31.3                 |
| GSM1296558      | 15272  | RNA-seq Ikaros KD Ik4056 pre-pro-B               | Ebf1(-/-)                                          | 4 days Dox induction, FACS-sorted | 50 bp single read   | 20.3                 |
| GSM1296562      | 15278  | RNA-seq Ikaros KD Ik4056 pre-pro-B               | Ebf1(-/-)                                          | 4 days Dox induction, FACS-sorted | 50 bp single read   | 23.1                 |
| GSM1296566      | 15284  | RNA-seq Ikaros KD Ik4056 pre-pro-B               | Ebf1(-/-)                                          | 4 days Dox induction, FACS-sorted | 50 bp single read   | 36.5                 |
| GSM1296570      | 15290  | RNA-seq Ikaros KD Ik4056 pre-pro-B               | Ebf1(-/-)                                          | 4 days Dox induction, FACS-sorted | 50 bp single read   | 36.3                 |
| GSM1296559      | 15273  | RNA-seq Ikaros KD Ik2709 pre-pro-B               | Ebf1(-/-)                                          | 4 days Dox induction, FACS-sorted | 50 bp single read   | 19.0                 |
| GSM1296563      | 15279  | RNA-seq Ikaros KD Ik2709 pre-pro-B               | Ebf1(-/-)                                          | 4 days Dox induction, FACS-sorted | 50 bp single read   | 21.0                 |
| GSM1296567      | 15285  | RNA-seq Ikaros KD Ik2709 pre-pro-B               | Ebf1(-/-)                                          | 4 days Dox induction, FACS-sorted | 50 bp single read   | 40.9                 |
| GSM1296571      | 15291  | RNA-seq Ikaros KD Ik2709 pre-pro-B               | Ebf1(-/-)                                          | 4 days Dox induction, FACS-sorted | 50 bp single read   | 36.8                 |
